# Supplementary material for: Bioinformatic Analyses of miRNA–mRNA Signature during hiPSC Differentiation towards Insulin-Producing Cells upon HNF4α Mutation
Source: PubMed Central journal article supplement (PMC7400504; doi:10.3390/biomedicines8070179), 2020-06-27
Supplement: biomedicines-08-00179-s001.pdf [file biomedicines-08-00179-s001.pdf]

**Table S1:** List of differentially expressed miRNAs (DEmiRs):

| CONTROL CELLS (EARLY vs LATE DIFFERENTIATION) | HNF4 $\alpha$ +/ $\Delta$ CELLS (EARLY vs LATE DIFFERENTIATION) | EARLY DIFFERENTIATION (HNF4 $\alpha$ +/ $\Delta$ vs CONTROL) | LATE DIFFERENTIATION (HNF4 $\alpha$ +/ $\Delta$ vs CONTROL) |
|-----------------------------------------------|-----------------------------------------------------------------|--------------------------------------------------------------|-------------------------------------------------------------|
| hsa-miR-1261                                  | hsa-miR-1281                                                    | hsa-miR-488-3p                                               | hsa-miR-34c-3p                                              |
| hsa-miR-761                                   | hsa-miR-608                                                     | hsa-miR-223-3p                                               | hsa-miR-576-5p                                              |
| hsa-let-7d-5p                                 | hsa-miR-138-5p                                                  | hsa-miR-761                                                  | hsa-miR-664b-3p                                             |
| hsa-miR-519d-3p                               | hsa-miR-1257                                                    | hsa-miR-142-3p                                               | hsa-miR-325                                                 |
| hsa-miR-595                                   | hsa-miR-489-3p                                                  | hsa-miR-555                                                  | hsa-miR-758-5p                                              |
| hsa-miR-770-5p                                | hsa-miR-215-5p                                                  | hsa-miR-520c-3p                                              | hsa-miR-195-5p                                              |
| hsa-miR-517c-3p+hsa-miR-519a-3p               | hsa-miR-1972                                                    | hsa-miR-521                                                  | hsa-miR-518b                                                |
| hsa-miR-572                                   | hsa-let-7d-5p                                                   | hsa-miR-1261                                                 | hsa-miR-146b-5p                                             |
| hsa-miR-1307-5p                               | hsa-miR-212-3p                                                  | hsa-miR-770-5p                                               | hsa-miR-142-3p                                              |
| hsa-miR-520a-5p                               | hsa-miR-548ah-5p                                                | hsa-miR-1236-3p                                              | hsa-miR-941                                                 |
| hsa-miR-373-3p                                | hsa-miR-498                                                     | hsa-miR-514a-3p                                              | hsa-miR-181b-2-3p                                           |
| hsa-miR-223-3p                                | hsa-miR-512-5p                                                  | hsa-miR-1307-5p                                              | hsa-miR-555                                                 |
| hsa-miR-4485-3p                               | hsa-miR-302a-5p                                                 | hsa-miR-595                                                  | hsa-miR-221-5p                                              |
| hsa-miR-1236-3p                               | hsa-miR-373-3p                                                  | hsa-miR-572                                                  | hsa-miR-608                                                 |
| hsa-miR-514a-3p                               | hsa-miR-1307-3p                                                 | hsa-miR-325                                                  | hsa-miR-499a-5p                                             |
| hsa-miR-520c-3p                               | hsa-miR-1323                                                    | hsa-miR-3180                                                 | hsa-miR-548d-5p                                             |
| hsa-miR-3180                                  | hsa-miR-488-3p                                                  | hsa-miR-210-3p                                               | hsa-miR-138-5p                                              |
| hsa-miR-1257                                  | hsa-miR-329-3p                                                  | hsa-miR-299-3p                                               | hsa-miR-1224-5p                                             |
| hsa-miR-142-3p                                | hsa-miR-383-5p                                                  | hsa-miR-320a                                                 | hsa-miR-105-5p                                              |
| hsa-miR-1281                                  | hsa-miR-889-3p                                                  | hsa-miR-651-5p                                               | hsa-miR-489-3p                                              |
| hsa-miR-608                                   | hsa-miR-760                                                     | hsa-miR-577                                                  | hsa-miR-330-3p                                              |
| hsa-miR-138-5p                                | hsa-miR-301b-5p                                                 | hsa-miR-122-5p                                               | hsa-miR-215-5p                                              |
| hsa-miR-325                                   | hsa-miR-542-3p                                                  | hsa-miR-100-5p                                               | hsa-miR-760                                                 |
| hsa-miR-372-3p                                | hsa-miR-941                                                     | hsa-miR-181a-5p                                              | hsa-miR-1972                                                |
| hsa-miR-521                                   | hsa-miR-887-5p                                                  | hsa-miR-199a-3p+hsa-miR-199b-3p                              | hsa-miR-34c-5p                                              |
| hsa-miR-215-5p                                | hsa-miR-654-5p                                                  | hsa-miR-199a-5p                                              | hsa-miR-548d-3p                                             |
| hsa-miR-489-3p                                | hsa-miR-654-3p                                                  | hsa-miR-10b-5p                                               | hsa-miR-193a-5p+hsa-miR-193b-5p                             |
| hsa-miR-1972                                  | hsa-miR-1185-1-3p                                               | hsa-miR-214-3p                                               | hsa-miR-330-5p                                              |
| hsa-miR-212-3p                                | hsa-miR-2682-5p                                                 | hsa-miR-491-5p                                               | hsa-miR-548ah-5p                                            |
| hsa-miR-548ah-5p                              | hsa-miR-615-3p                                                  | hsa-miR-10a-5p                                               | hsa-miR-1305                                                |
| hsa-miR-1298-5p                               | hsa-miR-490-3p                                                  | hsa-miR-181a-3p                                              | hsa-miR-212-3p                                              |
| hsa-let-7g-5p                                 | hsa-miR-4707-5p                                                 | hsa-let-7g-5p                                                | hsa-miR-521                                                 |
| hsa-let-7c-5p                                 | hsa-miR-409-5p                                                  | hsa-let-7d-5p                                                | hsa-let-7i-5p                                               |
| hsa-miR-485-3p                                | hsa-miR-377-3p                                                  | hsa-let-7c-5p                                                | hsa-miR-199a-5p                                             |
| hsa-miR-299-5p                                | hsa-miR-499a-5p                                                 |                                                              | hsa-let-7b-5p                                               |
| hsa-let-7f-5p                                 | hsa-miR-221-5p                                                  |                                                              | hsa-miR-378g                                                |
| hsa-miR-105-5p                                | hsa-miR-1224-5p                                                 |                                                              | hsa-miR-1323                                                |
| hsa-miR-664b-3p                               | hsa-miR-330-3p                                                  |                                                              | hsa-let-7a-5p                                               |
| hsa-miR-576-5p                                | hsa-miR-146b-5p                                                 |                                                              | hsa-miR-206                                                 |
| hsa-miR-324-3p                                | hsa-miR-30a-5p                                                  |                                                              | hsa-miR-372-3p                                              |
| hsa-miR-10a-5p                                | hsa-miR-345-5p                                                  |                                                              | hsa-let-7f-5p                                               |

|                 |                 |                                              |
|-----------------|-----------------|----------------------------------------------|
| hsa-miR-491-5p  | hsa-miR-1260b   | hsa-miR-496                                  |
| hsa-miR-206     | hsa-miR-210-3p  | hsa-let-7g-5p                                |
| hsa-miR-496     | hsa-miR-378g    | hsa-let-7c-5p                                |
| hsa-miR-499a-5p | hsa-miR-200a-3p | hsa-miR-324-3p                               |
| hsa-miR-221-5p  | hsa-miR-95-3p   | hsa-miR-4531                                 |
| hsa-miR-1224-5p | hsa-miR-362-3p  | hsa-miR-383-5p                               |
| hsa-miR-330-3p  | hsa-miR-483-3p  | hsa-miR-887-5p                               |
| hsa-miR-146b-5p | hsa-miR-141-3p  | hsa-miR-548y                                 |
| hsa-miR-95-3p   | hsa-miR-10b-5p  | hsa-miR-520a-5p                              |
| hsa-miR-744-5p  | hsa-miR-10a-5p  | hsa-miR-432-5p                               |
| hsa-miR-10b-5p  | hsa-miR-521     | hsa-miR-4485-3p                              |
|                 | hsa-miR-206     | hsa-miR-498                                  |
|                 | hsa-miR-29c-3p  | hsa-miR-373-3p                               |
|                 | hsa-miR-381-3p  | hsa-miR-196a-5p                              |
|                 | hsa-miR-429     | hsa-miR-370-3p                               |
|                 | hsa-miR-555     | hsa-miR-514b-5p                              |
|                 | hsa-miR-330-5p  | hsa-miR-1197                                 |
|                 | hsa-miR-496     | hsa-miR-139-3p                               |
|                 | hsa-miR-190a-5p | hsa-miR-98-5p                                |
|                 | hsa-miR-337-5p  | hsa-miR-381-3p                               |
|                 | hsa-miR-491-5p  | hsa-miR-214-3p                               |
|                 | hsa-miR-433-3p  | hsa-miR-431-5p                               |
|                 |                 | hsa-miR-1253                                 |
|                 |                 | hsa-miR-519d-3p                              |
|                 |                 | hsa-miR-889-3p                               |
|                 |                 | hsa-miR-181a-3p                              |
|                 |                 | hsa-miR-888-5p                               |
|                 |                 | hsa-miR-526a+hsa-miR-518c-5p+hsa-miR-518d-5p |
|                 |                 | hsa-miR-517c-3p+hsa-miR-519a-3p              |
|                 |                 | hsa-miR-548e-5p                              |
|                 |                 | hsa-miR-891b                                 |
|                 |                 | hsa-miR-654-5p                               |
|                 |                 | hsa-miR-512-5p                               |
|                 |                 | hsa-miR-329-3p                               |
|                 |                 | hsa-miR-654-3p                               |
|                 |                 | hsa-miR-1185-1-3p                            |
|                 |                 | hsa-miR-4707-5p                              |
|                 |                 | hsa-miR-563                                  |
|                 |                 | hsa-miR-585-3p                               |
|                 |                 | hsa-miR-495-5p                               |
|                 |                 | hsa-miR-1185-2-3p                            |
|                 |                 | hsa-miR-615-3p                               |
|                 |                 | hsa-miR-2682-5p                              |
|                 |                 | hsa-miR-518e-3p                              |
|                 |                 | hsa-miR-513a-3p                              |

hsa-miR-208b-3p  
hsa-miR-301b-5p  
hsa-miR-369-3p  
hsa-miR-4536-5p  
hsa-miR-363-5p  
hsa-miR-490-3p  
hsa-miR-515-5p  
hsa-miR-5196-3p+hsa-miR-  
6732-3p  
hsa-miR-409-5p  
hsa-miR-525-5p  
hsa-miR-526b-5p  
hsa-let-7d-5p  
hsa-miR-377-3p  
hsa-miR-512-3p  
hsa-miR-433-3p  
hsa-miR-337-5p  
hsa-miR-181a-2-3p  
hsa-miR-196b-5p
